# Supplementary material
Source: PubMed Central journal article supplement (PMC8174404)
Supplement: NIHMS1705159-supplement-Supplemental.pdf [file NIHMS1705159-supplement-Supplemental.pdf]

## Supplemental Figure

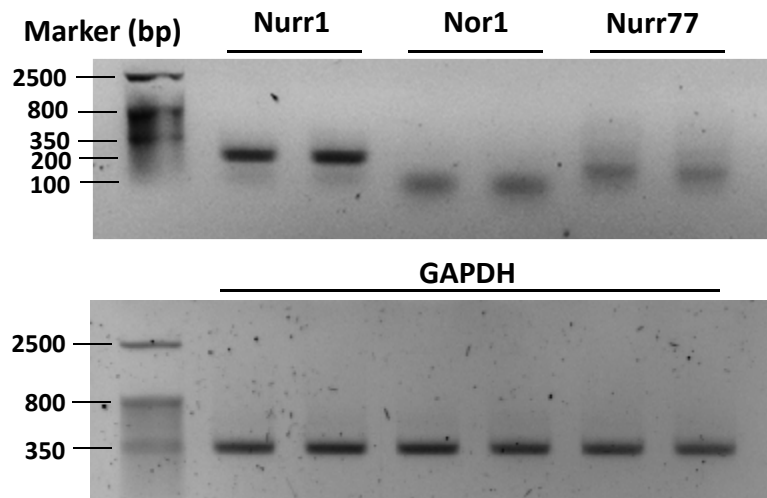

**Fig. S1.** The mRNA expression of Nurr1, Nor1 and Nor77 in mouse liver. C57/BL6 mice (8-10 week old) were sacrificed and the mRNA expression of Nurr1, Nor1 and Nor77 was examined by semi-quantitative RT-PCR. GAPDH was run as a house-keeping control. Samples of two different mice were run.
